# Supplementary material for: Engineering Salmonella as intracellular factory for effective killing of tumour cells
Source: PubMed Central journal article supplement (PMC4964584; doi:10.1038/srep30591), 2016-07-28
Supplement: srep30591-s1.pdf [file srep30591-s1.pdf]

# **Engineering *Salmonella* as intracellular factory for effective killing of tumour cells**

**Eva María Camacho\*, Beatriz Mesa-Pereira, Carlos Medina, Amando Flores, Eduardo Santero.**

Centro Andaluz de Biología del Desarrollo/ CSIC/ Universidad Pablo de Olavide/ Junta de Andalucía.

Departamento de Biología Molecular e Ingeniería Bioquímica, Seville, Spain

Supplementary Figure S1:

A

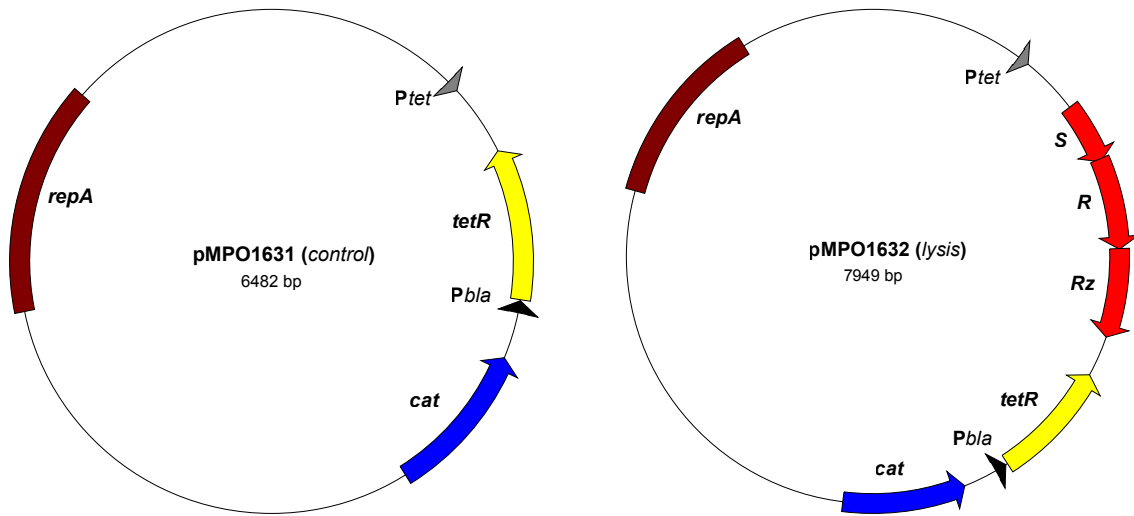

B

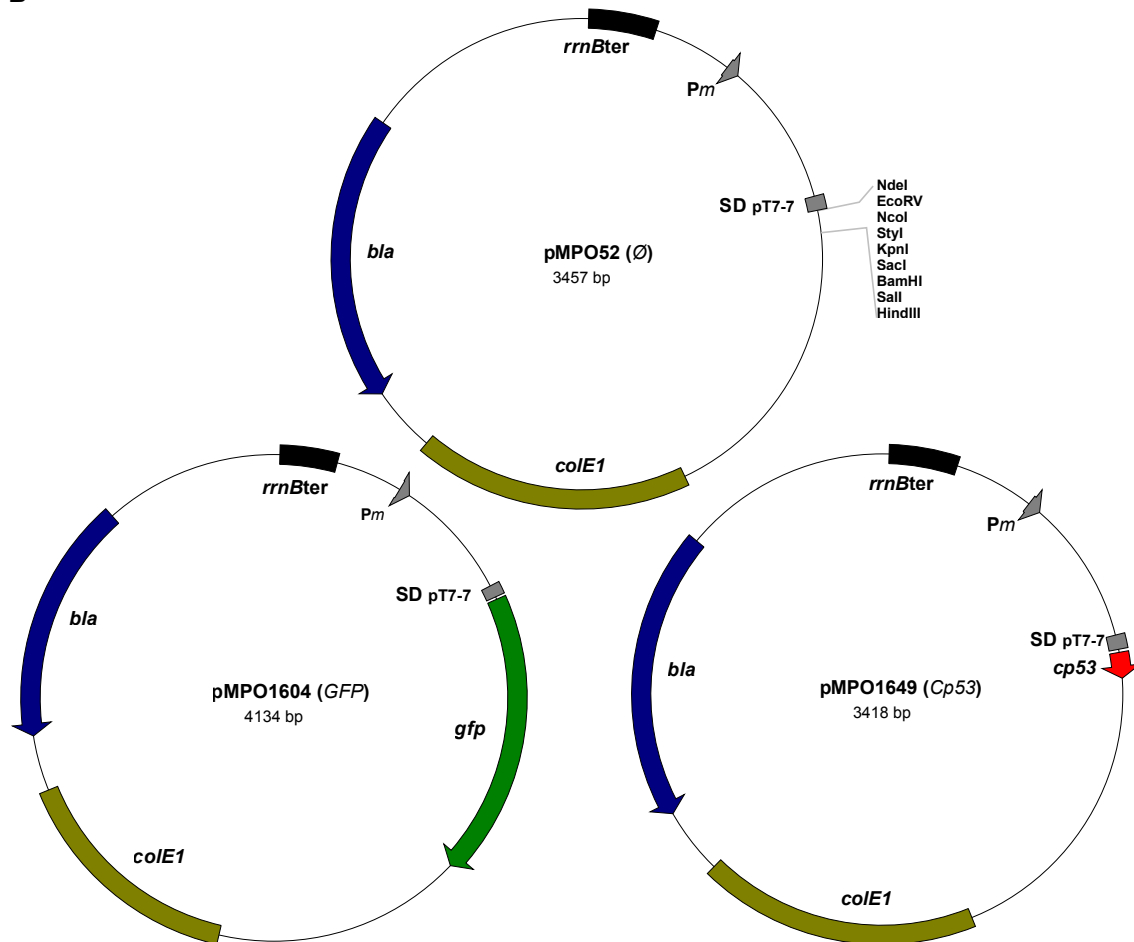

Figure S1: Schematic diagram of the lysis and expression plasmids used in this study. (A) Low copy number plasmid (pSC101 replicon) containing the lambda lysis cluster (pMPO1632 or Lysis) and its control (pMPO1631 or control). (B) Vector for GFP (pMPO1604 or *gfp*) and Cp53 (pMPO1649 or Cp53) expression and the empty vector pMPO52

**Supplementary Table S1. Strain and plasmids**

|                                      | Characteristics                                                                                                         | Reference             |
|--------------------------------------|-------------------------------------------------------------------------------------------------------------------------|-----------------------|
| <b><i>E. coli</i> strains</b>        |                                                                                                                         |                       |
| <i>DH5<math>\alpha</math></i>        | <i>deoR endA1 gyrA96 recA1 supE44</i>                                                                                   | 1                     |
| <b><i>S. typhimurium</i> strains</b> |                                                                                                                         |                       |
| 14028                                | Wild type strain                                                                                                        | 2                     |
| MPO38                                | $\Delta$ <i>sifA::Km</i>                                                                                                | This work             |
| MPO42                                | $\Delta$ <i>sifA</i>                                                                                                    | This work             |
| MPO96                                | 14028 $\Delta$ <i>trg:: (nahR/P<sub>sal-xyIS2-nasR/Km/P<sub>Tac</sub>-gfp)</sub></i> fusion                             | 3                     |
| MPO340                               | 14028 $\Delta$ <i>trg:: (nahR/P<sub>sal-xyIS2-nasR/Cm/P<sub>Tac</sub>-dTomato)</sub></i> fusion                         | This work             |
| MPO386                               | 14028 $\Delta$ <i>sifA \Delta</i> <i>trg:: (nahR/P<sub>sal-xyIS2-nasR/Cm/P<sub>Tac</sub>-dTomato)</sub></i> fusion      | This work             |
| MPO387                               | 14028 $\Delta$ <i>sifA \Delta</i> <i>trg:: (nahR/P<sub>sal-xyIS2-nasR/P<sub>Tac</sub>-dTomato)</sub></i> fusion         | This work             |
| <b>Plasmids</b>                      |                                                                                                                         |                       |
| pASKIBA43plus                        | ApR, expression plasmid. The expression cassette is under transcriptional control of the tetracycline promoter/operator | IBA Biotag technology |
| pCP20                                | ApR, CmR, Ts (30°C)                                                                                                     | 4                     |
| pFPV25-1                             | <i>rpsM::gfp</i> mut                                                                                                    | 5                     |
| pKD3                                 | ApR, CmR, OriR $\gamma$                                                                                                 | 6                     |
| pKD4                                 | ApR, KmR, OriR $\gamma$                                                                                                 | 6                     |
| pKD46                                | ApR, <i>oriR101</i> , <i>repA101(ts)</i> , <i>araBp-gam-bet-exo</i>                                                     | 6                     |
| pMPO51                               | ApR, expression vector with <i>rrnBT1T2-P<sub>m</sub>-MCSII</i> , ColE1 replication origin                              | 3                     |
| pMPO52                               | ApR, expression vector with <i>rrnBT1T2-P<sub>m</sub>-T7 SD sequence-MCSII</i> , ColE1 replication origin               | 3                     |
| pMPO1065                             | Derived from pMM40 <sup>7</sup> . ApR, CmR-His t-P <sub>Tac</sub> - <i>tdTomato</i> (Clontech Laboratories)             | This work             |
| pMPO1086                             | ApR, CmR, pWSK29 derived plasmid with <i>P<sub>m</sub>-SRRz</i> and <i>P<sub>bla</sub>-tetR</i>                         | This work             |
| pMPO1604                             | ApR, pMPO51 derived plasmid with <i>gfp</i> cloned downstream P <sub>m</sub>                                            | This work             |

|          |                                                                                              |           |
|----------|----------------------------------------------------------------------------------------------|-----------|
| pMPO1631 | CmR, pWSK29 derived plasmid with <i>P<sub>bla</sub>-tetR</i>                                 | This work |
| pMPO1632 | pMPO1086 derived plasmid with CmR, <i>P<sub>m</sub>-SRRz</i> and <i>P<sub>bla</sub>-tetR</i> | This work |
| pMPO1649 | ApR, pMPO52 derived plasmid with <i>cp53</i> cloned downstream Pm                            | This work |
| pWSK29   | ApR cloning vector                                                                           | 8         |

---

## REFERENCES

- 1 Hanahan, D. Studies on transformation of *Escherichia coli* with plasmids. *J. Mol. Biol.* **166**, 557-580 (1983).
- 2 Fields, P. I., Swanson, R. V., Haidaris, C. G. & Heffron, F. Mutants of *Salmonella typhimurium* that cannot survive within the macrophage are avirulent. *Proc. Natl. Acad. Sci. U S A* **83**, 5189-5193 (1986).
- 3 Medina, C., Camacho, E. M., Flores, A., Mesa-Pereira, B. & Santero, E. Improved expression systems for regulated expression in *Salmonella* infecting eukaryotic cells. *PLoS one* **6**, e23055, doi:10.1371/journal.pone.0023055 (2011).
- 4 Cherepanov, P. P. & Wackernagel, W. Gene disruption in *Escherichia coli*: TcR and KmR cassettes with the option of Flp-catalyzed excision of the antibiotic-resistance determinant. *Gene* **158**, 9-14, doi:037811199500193A [pii] (1995).
- 5 Valdivia, R. H., Hromockyj, A. E., Monack, D., Ramakrishnan, L. & Falkow, S. Applications for green fluorescent protein (GFP) in the study of host-pathogen interactions. *Gene* **173**, 47-52 (1996).
- 6 Datsenko, K. A. & Wanner, B. L. One-step inactivation of chromosomal genes in *Escherichia coli* K-12 using PCR products. *Proc. Natl. Acad. Sci. U S A* **97**, 6640-6645, doi:10.1073/pnas.120163297 (2000).
- 7 Kleiner, D., Paul, W. & Merrick, M. J. Construction of multicopy expression vectors for regulated over-production of proteins in *Klebsiella pneumoniae* and other enteric bacteria. *J. Gen. Microbiol.* **134**, 1779-1784, doi:10.1099/00221287-134-7-1779 (1988).
- 8 Wang, R. F. & Kushner, S. R. Construction of versatile low-copy-number vectors for cloning, sequencing and gene expression in *Escherichia coli*. *Gene* **100**, 195-199 (1991).

**Supplementary Table S2.** Primers used for this work

| <b>Primer name</b> | <b>Sequence (5'-&gt;3')</b>                                                      |
|--------------------|----------------------------------------------------------------------------------|
| antifinsifa-P1     | aaaacctgatcagagatggcttcgactatctcagctaacatacttggctttaggctggagctgctc               |
| Cp53-Fw            | tatgcgcatatggggagcagggctcactccagccacctaagtccaaaagggtcagctctacctcccgccattaagcttat |
| Cp53-Rev           | ataaagcttaatggcgggaggtagactgacccttttggacttcaggtggctggagtgagccctgctcccatatgcgcata |
| lisFw              | acggatggcaacatattaac                                                             |
| lislbdrev          | atatgggcaactctatctgc                                                             |
| prinsifa-P2        | tctacatgagatggtgttggccgaacgcgccccacacgagagcggcttacatagaatcctccttag               |
| Sac-P1             | tatagagctctgtaggctggagctgctc                                                     |
| sifAE1             | tactccagtataagtgag                                                               |
| tomatoHindIIIIR    | taaagctttactgtacagctcgctc                                                        |
| xylSFw2            | tgaacgatcccagtgccaatgtgc                                                         |
